# Supplementary material for: An integrin αEβ7-dependent mechanism of IgA transcytosis requires direct plasma cell contact with intestinal epithelium
Source: PubMed Central journal article supplement (PMC8528714; doi:10.1038/s41385-021-00439-x), 2021-08-20
Supplement: 41385_2021_439_MOESM1_ESM.pdf [file 41385_2021_439_MOESM1_ESM.pdf]

**An integrin  $\alpha E\beta 7$ -dependent mechanism of IgA transcytosis requires plasma cell contact with intestinal epithelium**

Mauricio Guzman, Luke R. Lundborg, Shaila Yeasmin, Christopher J. Tyler, Nadia R. Zgajnar, Vanessa Taupin, Katarzyna Dobaczewska, Zbigniew Mikulski, Giorgos Bamias and Jesús Rivera-Nieves\*

**Supplementary Information:**

Supplementary Figures 1-6

Tables 1-3

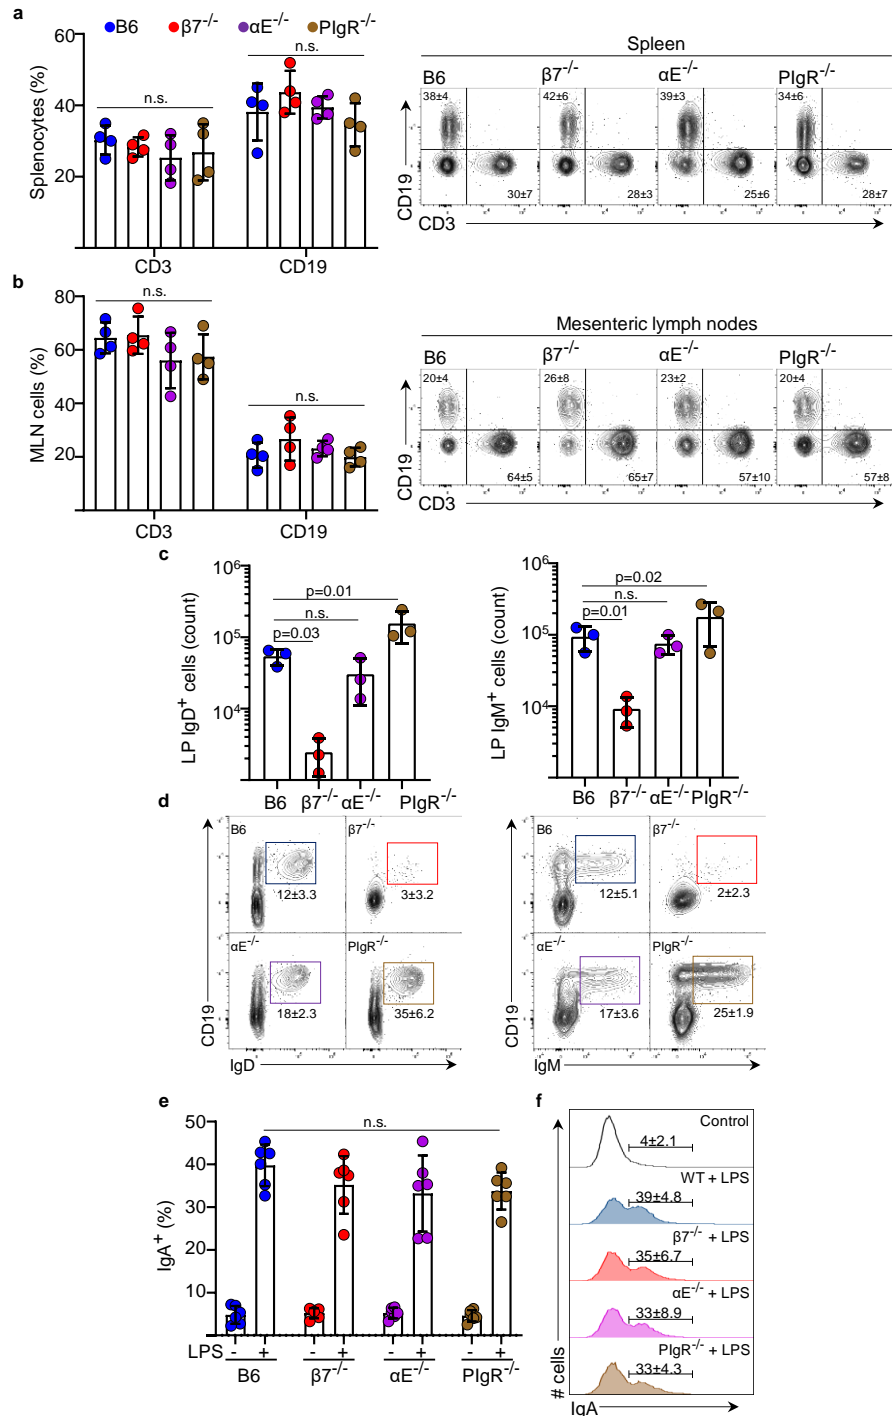

**Figure S1. T and B cell recruitment to spleen and MLN are normal in all mouse strains whereas intestinal IgD $^{+}$  and IgM $^{+}$  ASC recruitment is compromised only in  $\beta 7^{-/-}$  mice. (a, b) Percentages and representative plots of CD3 $^{+}$  and CD19 $^{+}$  cells in the spleen and MLN (n=4/strain, statistical significance determined using ANOVA, followed by Tukey's multiple comparison test). (c, d) Absolute counts of IgD $^{+}$  and IgM $^{+}$  within the ileal LP and representative contour plots (n=3/strain, statistical significance determined using ANOVA, followed by Tukey's multiple comparison test). (e) Percentage of IgA $^{+}$  cells after *in vitro* stimulation of splenocytes with or without LPS for 72 h (f) representative histogram plots (mean  $\pm$  SD, n=3-6 mice per group from three independent experiments).**

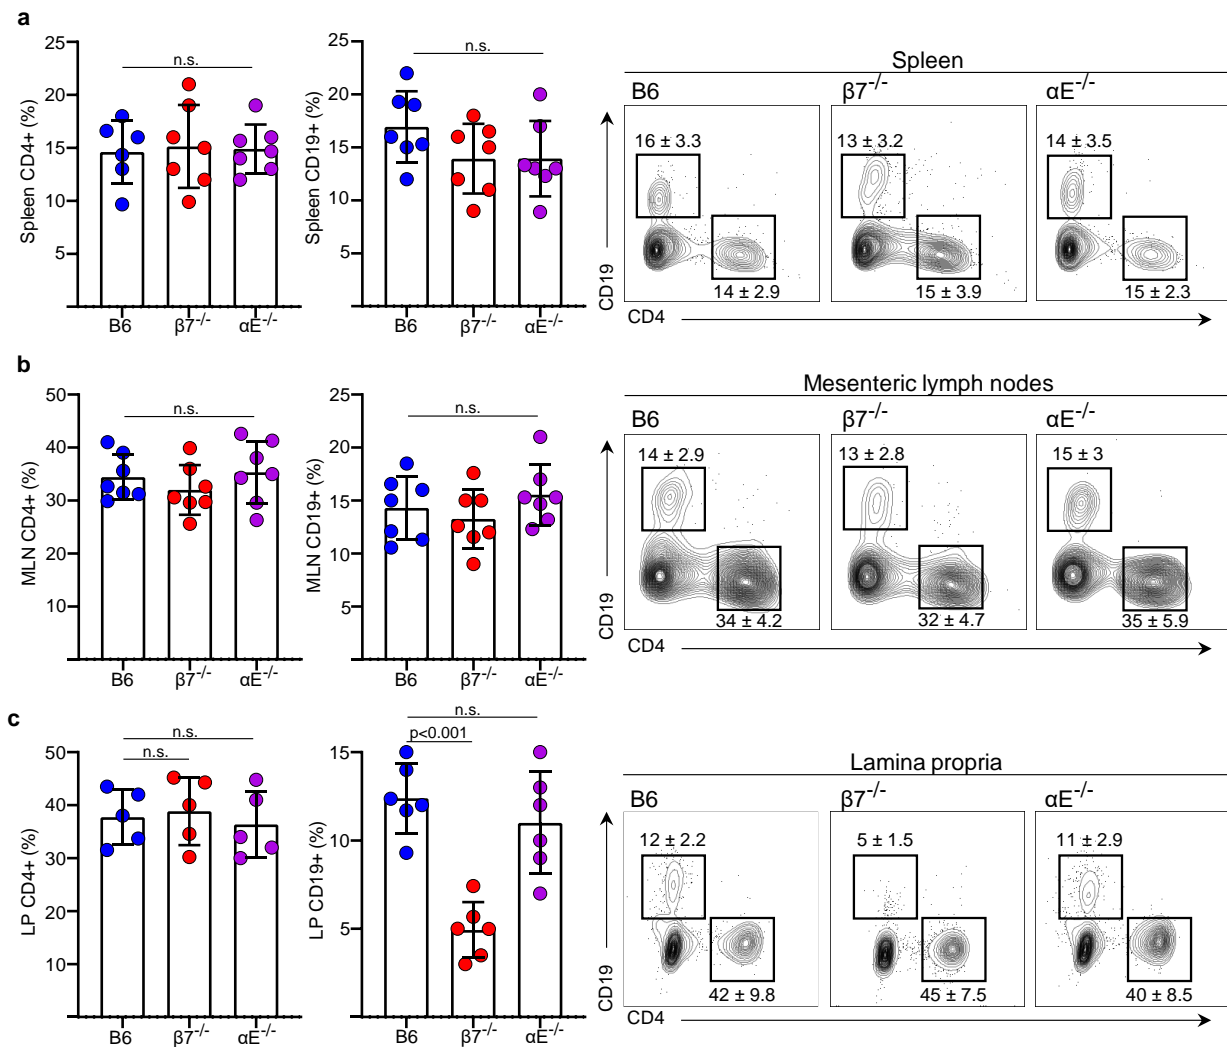

**Figure S2. T and B cell reconstitution of spleen, MLN and LP is normal in  $RAG1^{-/-}$  mice receiving  $CD4^{+}$  T cells from all strains, while only  $\beta 7^{-/-}$  B cells are unable to reconstitute the LP compartment. (a, b, c) Percentages and representative contour plots of  $CD4^{+}$  and  $CD19^{+}$  cells within (a) spleen, (b) mesenteric lymph nodes and (c) ileal lamina propria of reconstituted  $RAG1^{-/-}$  mice. (mean  $\pm$  SD,  $n=5-7$  mice, statistical significance determined using ANOVA, followed by Tukey's multiple comparison test).**

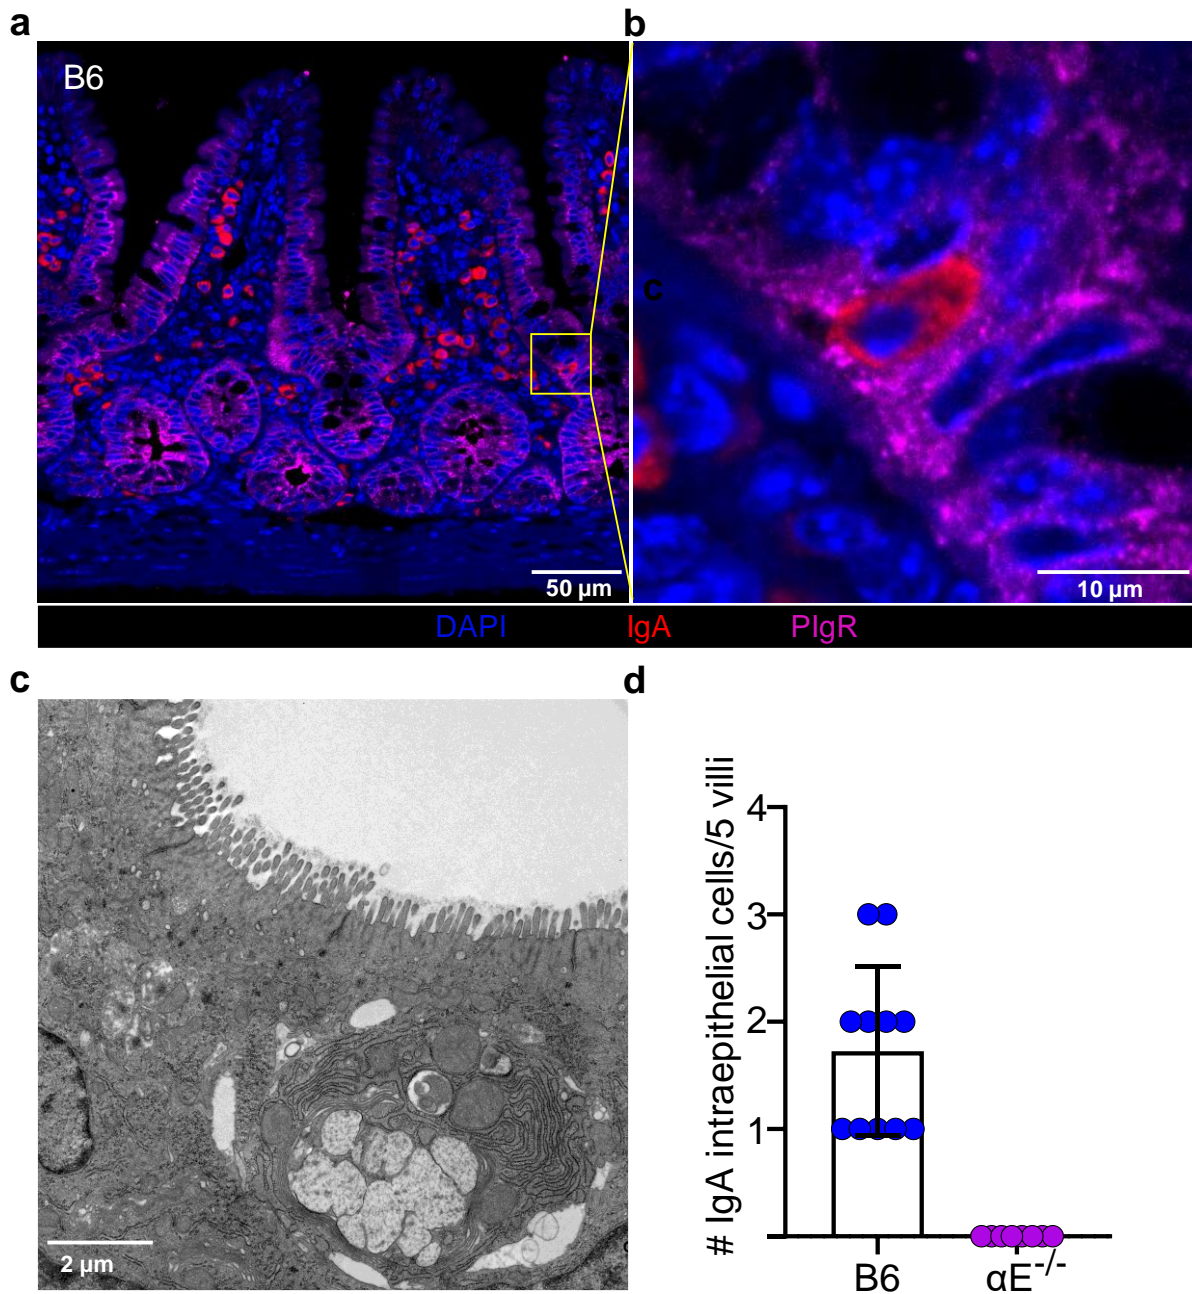

**Figure S3. Intraepithelial IgA ASC interdigitate within pIgR-expressing IEC near the crypt base of B6 mice yet are absent in  $\alpha E^{-/-}$  mice. (a)** IF staining of IgA+ ASC and pIgR (representative images of terminal ileum) **(b)** High magnification IF image and **(c)** TEM image of IgA+ ASC infiltrating epithelium. **(d)** Number of intraepithelial IgA+ ASC per 5 terminal ileal villi.

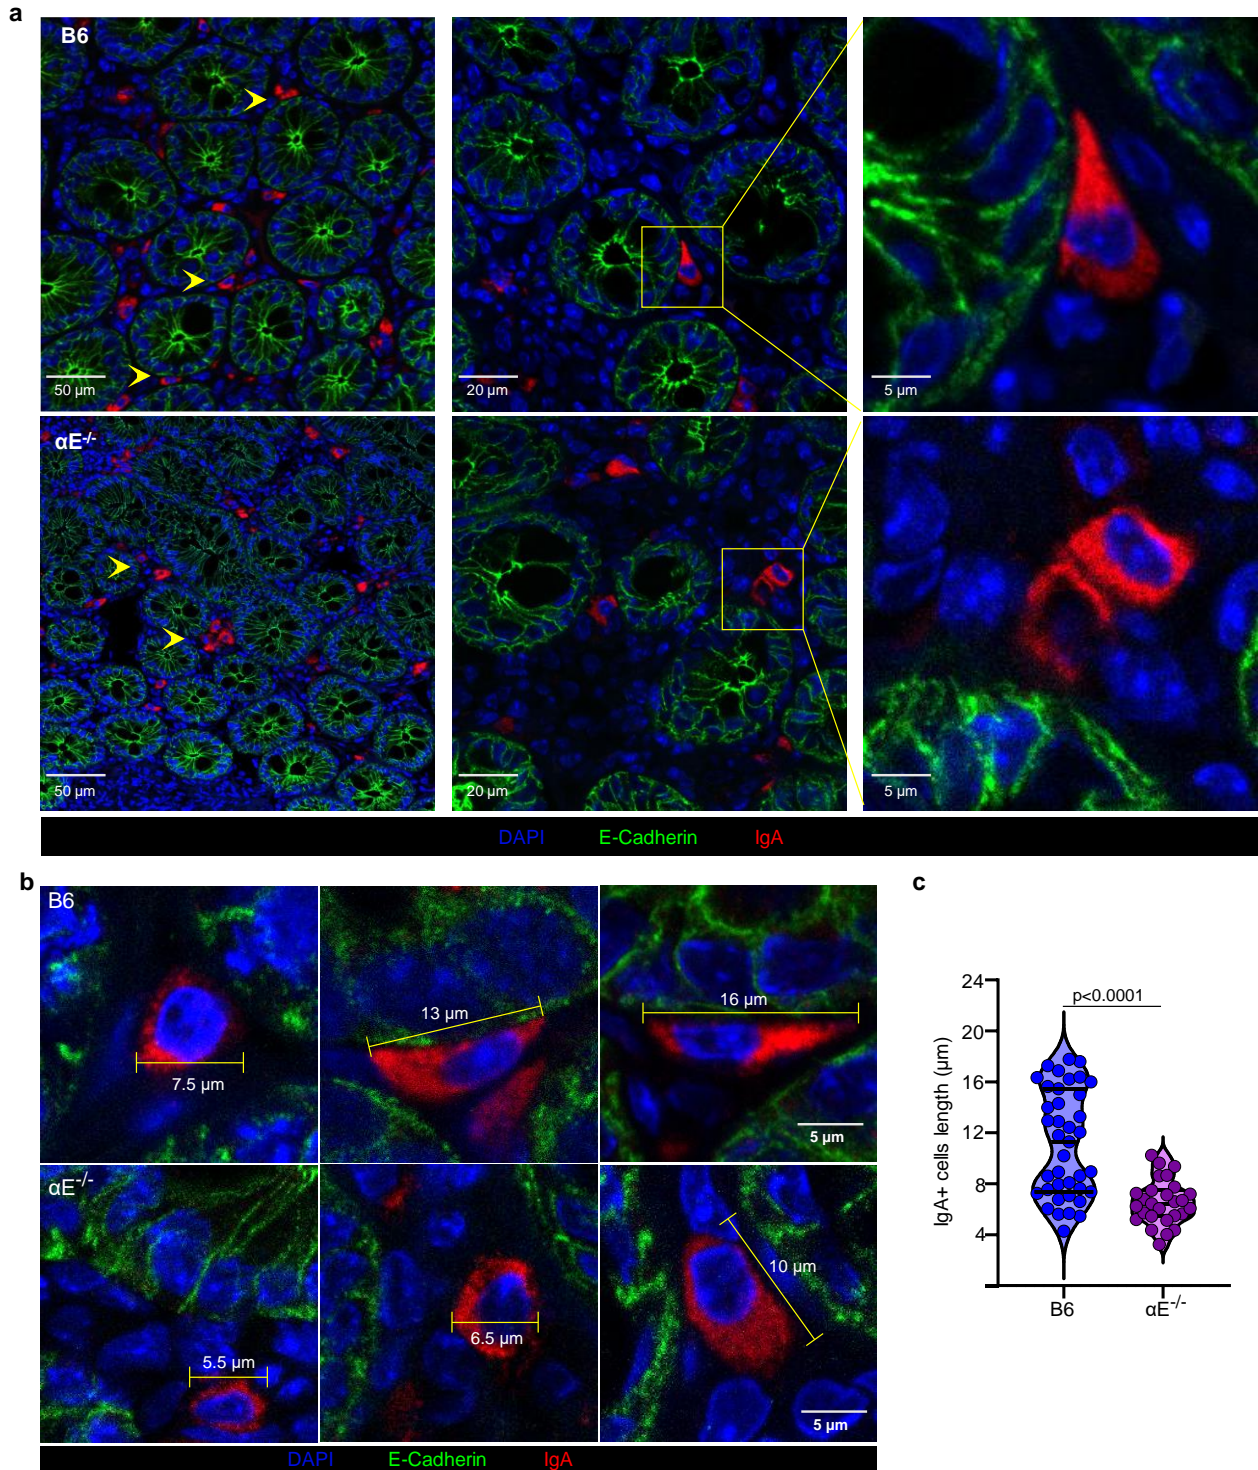

**Figure S4. IgA+ ASC acquire a sickled morphology in the pericryptal region of B6 mice but not in CD103<sup>-/-</sup> mice. (a)** Representative IF images of IgA<sup>+</sup> ASC and E-cadherin show sickled/flattened morphology and IEC adherence in B6 mice. **(b)** Representative images of the morphology and length assessment of IgA<sup>+</sup> ASC in indicated strains. **(c)** IgA<sup>+</sup> ASC > 12  $\mu$ m are absent in ileal LP of  $\alpha E^{-/-}$  mice. Violin plot of median and quartiles,  $n > 30$  cells from 3 independent experiments,  $p$  calculated by Student's t-test.

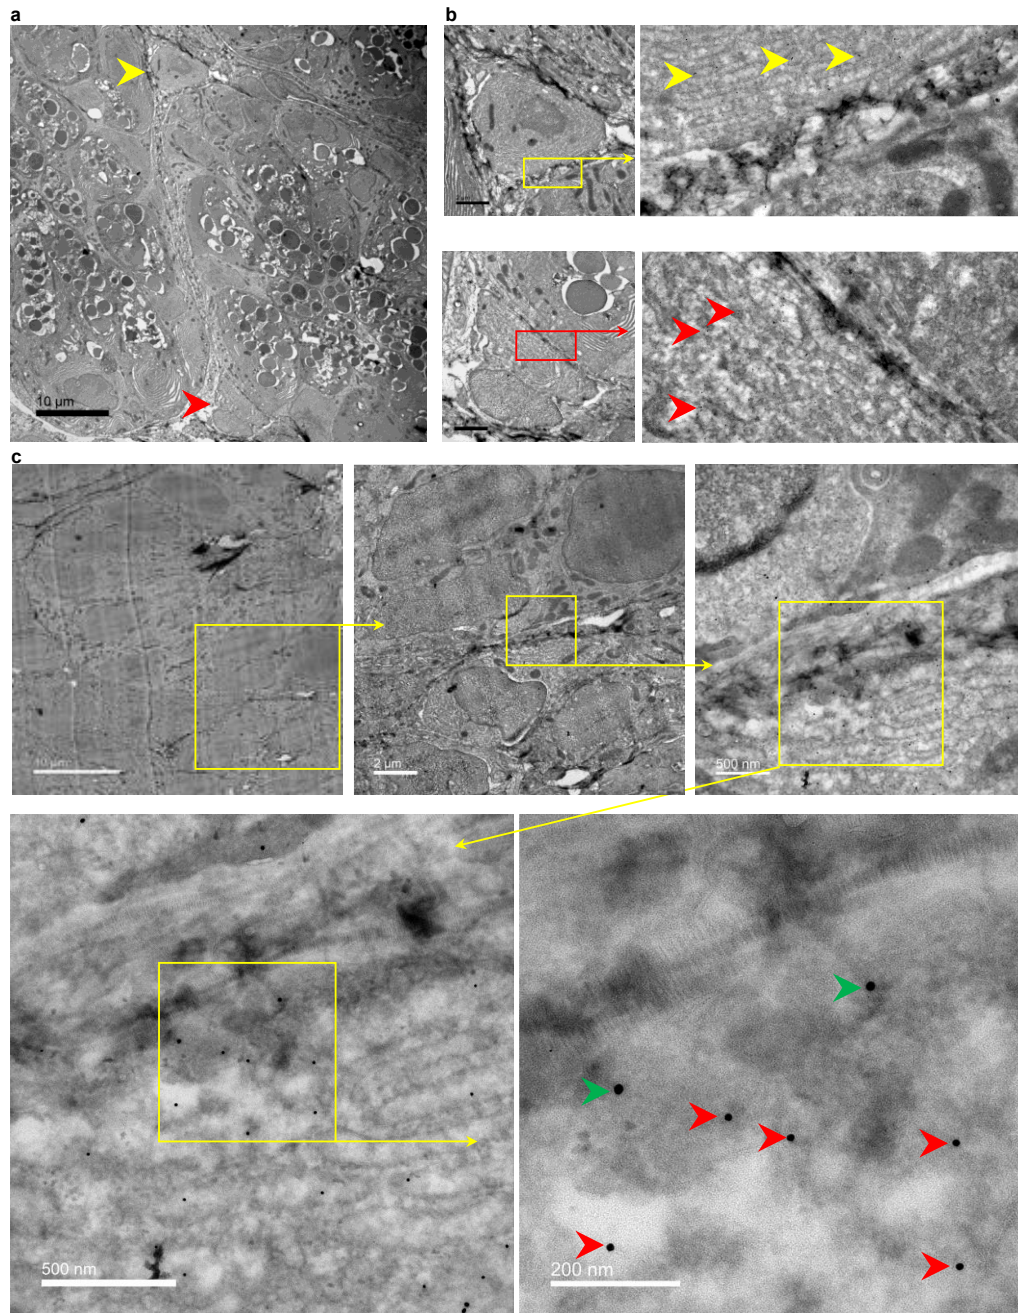

**Figure S5. A subset of adherent IgA<sup>+</sup> ASC express integrin  $\alpha$ E and establish direct contact with intestinal epithelial cells. (a)** TEM images of cross sections through the crypt base show 2 adherent cells (arrowheads) in contact with epithelial cells (likely Paneth cells) **(b)** Higher magnification shows cell to cell contact and immunogold particles within RER of adherent cells. **(c)** TEM images demonstrate co-expression of IgA (red arrows, 12nm immunogold particles) and integrin  $\alpha$ E (green arrows, 18nm immunogold particles) in adherent cells. Increasing magnification of the yellow-box area. (Representative images of cross sections through the ileal pericryptal base from three B6 mice).

**Table S1: Antibodies used for flow cytometry.**

| Target             | Clone     | Conjugate      | Vendor        | Product number |
|--------------------|-----------|----------------|---------------|----------------|
| CD3                | 17A2      | APC-eFluor 780 | eBioscience   | 47-0032-82     |
| CD19               | eBio1D3   | PerCO-Cy5.5    | eBioscience   | 45-0193-82     |
| IgA                | mA-6E1    | PE             | eBioscience   | 12-4204-82     |
| IgD                | 11.26c.2a | BV650          | Biolegend     | 405721         |
| IgM                | RMM-1     | BV605          | Biolegend     | 406523         |
| IgG                | Poly      | BV510          | Biolegend     | 405331         |
| CD49d              | R1-2      | BV480          | BD Bioscience | 746526         |
| Integrin $\beta$ 7 | FIB504    | BV421          | BD Bioscience | 564283         |
| CD103              | 2E7       | AlexaFluor 647 | Biolegend     | 121410         |
| Live dead          |           | Zombie NIR dye | Biolegend     | 423106         |

**Table S2: Antibodies used for immunostaining and confocal laser scanning microscopy.**

| Target                                                   | Host                | Clone      | Vendor                                        | Reference       | Concentration |
|----------------------------------------------------------|---------------------|------------|-----------------------------------------------|-----------------|---------------|
| Mouse IgA                                                | Rat                 | C10-3      | BD Pharmingen<br>(La Jolla, CA)               | 556969          | 2.5 ug/ml     |
| Mouse E-Cadherin                                         | Rabbit              | 24E10      | Cell Signaling<br>Technology<br>(Danvers, MA) | 3195s           | 2 ug/ml       |
| Mouse pIgR                                               | Goat                | Polyclonal | R&D System<br>(Minneapolis,<br>MN)            | AF2800          | 2 ug/ml       |
| Mouse CD31                                               | Armenian<br>hamster | 2H8        | Millipore Sigma                               | MAB1998<br>Z    | 2 ug/ml       |
| Alexa Fluor 488<br>anti-rabbit (H+L)                     | Goat                | Polyclonal | Jackson<br>ImmunoResearch                     | 111-545-<br>144 | 2 ug/ml       |
| Alexa Fluor 488<br>anti-Armenian<br>hamster IgG<br>(H+L) | Goat                | Polyclonal | Jackson<br>ImmunoResearch                     | 127-545-<br>160 | 2 ug/ml       |
| Alexa Fluor 594<br>anti-rat IgG (H+L)                    | Goat                | Polyclonal | Invitrogen                                    | A-11007         | 2 ug/ml       |
| Alexa Fluor 647<br>anti-goat                             | Donkey              | Polyclonal | Invitrogen                                    | A-21447         | 2 ug/ml       |

**Table S3: Antibodies used for immunoelectron microscopy.**

| Target                                                        | Host   | Clone      | Vendor                          | Reference   | Concentration |
|---------------------------------------------------------------|--------|------------|---------------------------------|-------------|---------------|
| Mouse IgA                                                     | Rat    | C10-3      | BD Pharmingen<br>(La Jolla, CA) | 556969      | 2.5 ug/ml     |
| Mouse CD103                                                   | Rabbit | Polyclonal | Invitrogen                      | PA5-99400   | 2 ug/ml       |
| 12 nm Colloidal<br>Gold AffiniPure<br>Goat Anti-Rat IgG       | Goat   | Polyclonal | Jackson<br>ImmunoResearch       | 112-205-143 | 1:20          |
| 18 nm Colloidal<br>Gold AffiniPure<br>Goat Anti-Rabbit<br>IgG | Goat   | Polyclonal | Jackson<br>ImmunoResearch       | 111-215-144 | 1:20          |
